# Supplementary material for: Exploring the drivers of the increased ozone production in Beijing in summertime during 2005–2016
Source: Copernicus journal article supplement (doi:10.5194/acp-20-15617-2020), 2020-12-16
Supplement: Supplementary file 1 [file acp-20-15617-2020-supplement.pdf]

Supplement of Atmos. Chem. Phys., 20, 15617–15633, 2020  
<https://doi.org/10.5194/acp-20-15617-2020-supplement>  
© Author(s) 2020. This work is distributed under  
the Creative Commons Attribution 4.0 License.

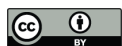

*Supplement of*

## **Exploring the drivers of the increased ozone production in Beijing in summertime during 2005–2016**

**Wenjie Wang et al.**

*Correspondence to:* Xin Li (li\_xin@pku.edu.cn)

The copyright of individual parts of the supplement might differ from the CC BY 4.0 License.

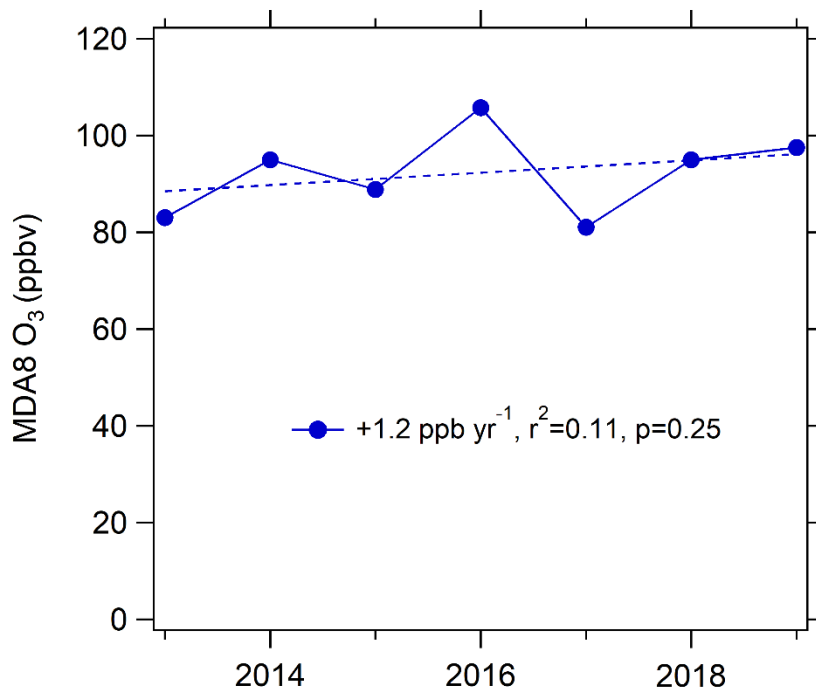

Figure S1. The trend of average MDA8 ozone in Changdao during 2013-2019. These data are acquired from “Blue book on prevention and control of atmospheric ozone pollution in China (in Chinese)” reported by Chinese Society of Environmental Sciences in 2020

([http://www.ep-serve.com/forepart/zxnr\\_index.do?oid=51478637&tid=26378242](http://www.ep-serve.com/forepart/zxnr_index.do?oid=51478637&tid=26378242)).

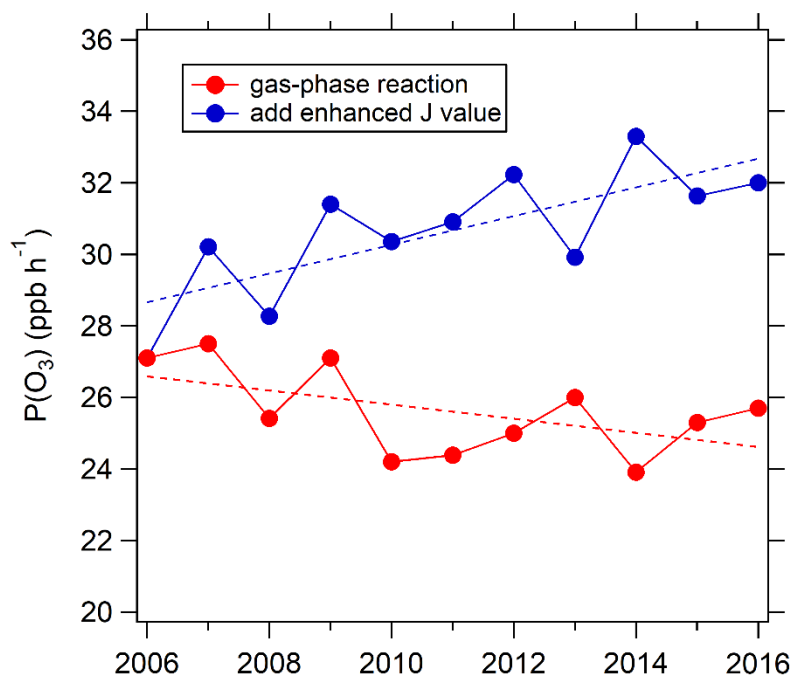

Figure S2. Trend of monthly afternoon (12:00-15:00) mean  $P(O_3)$  simulated by the chemical box model. Red dots: Only the gas-phase reactions are considered in the box model constrained by observed photolysis frequencies from 2006 for all eleven years. Blue dots: the box model as above, but constrained by the photolysis frequencies derived for each year without the changing aerosol uptake of  $HO_2$  considered.

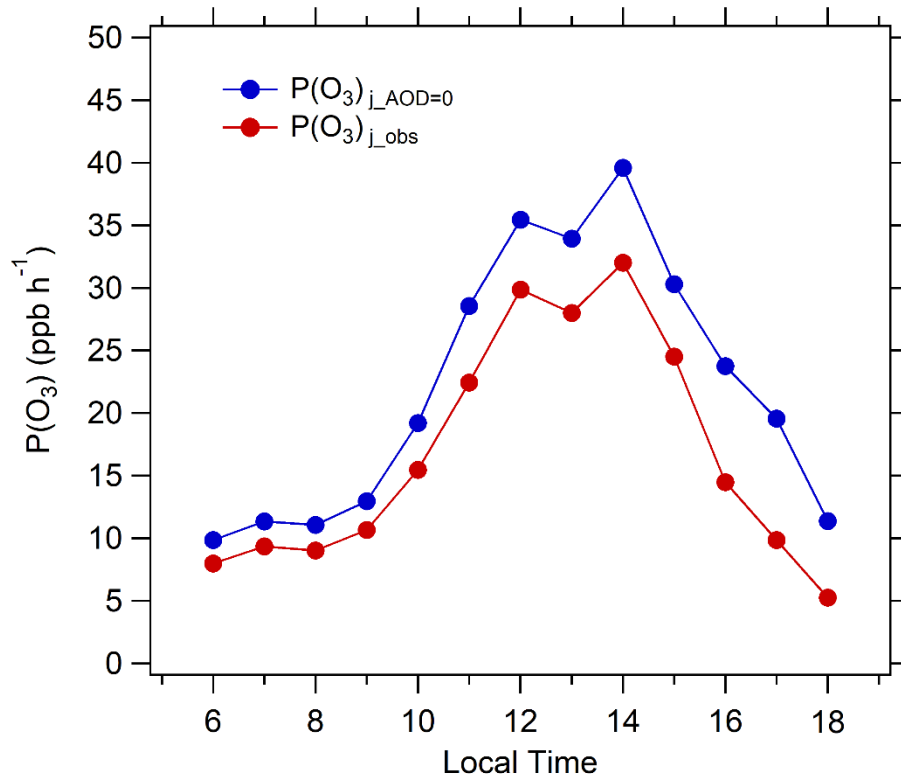

Figure S3. Diurnal variation of simulated  $P(O_3)$  in Beijing in August during 2006-2016.  $P(O_3)_{j_{obs}}$  represents ozone production rate under observed photolysis frequencies;  $P(O_3)_{j_{AOD=0}}$  represents ozone production rate under calculated photolysis frequencies when AOD is equal to 0.
